# Supplementary material for: An alumina-modified glassy carbon electrode: a robust platform for accurate nimodipine detection in pharmaceutical applications
Source: Royal Society of Chemistry journal article supplement (doi:10.1039/d4ay01979b), 2025-01-01
Supplement: d4ay01979b1.pdf [file d4ay01979b1.pdf]

**Alumina-Modified Glassy Carbon Electrode: A Robust Platform for  
Accurate Nimodipine Detection in Pharmaceutical Applications**

**Caio Raphael Vanoni, Rayane Bueno Goularte, Adriano Rogério Silva Lima, Nicolly  
Bittencourt Guedes, Marcos Roberto Scheide, Giovana Carolina Bazzo, Renato L.  
T. Parreira, Giovanni Finoto Caramori, Glaucio Régis Nagurniak, Marta Elisa  
Rosso Dotto, Hellen Karine Stulzer, and Cristiane Luisa Jost**

**SUPPLEMENTARY INFORMATION**

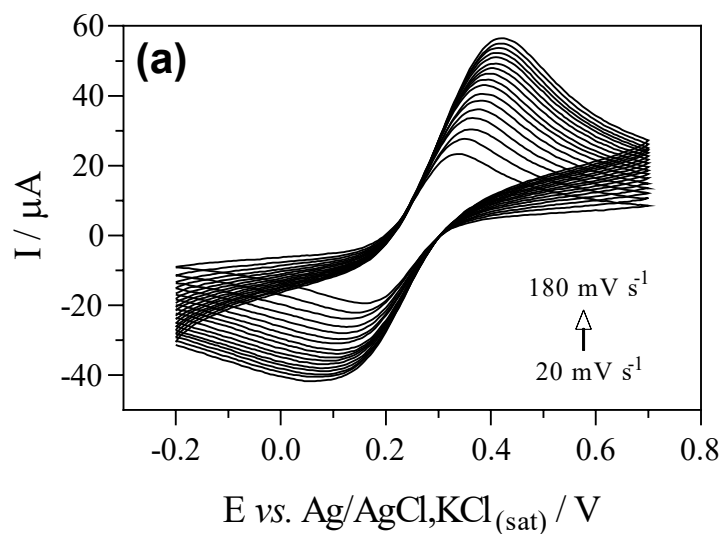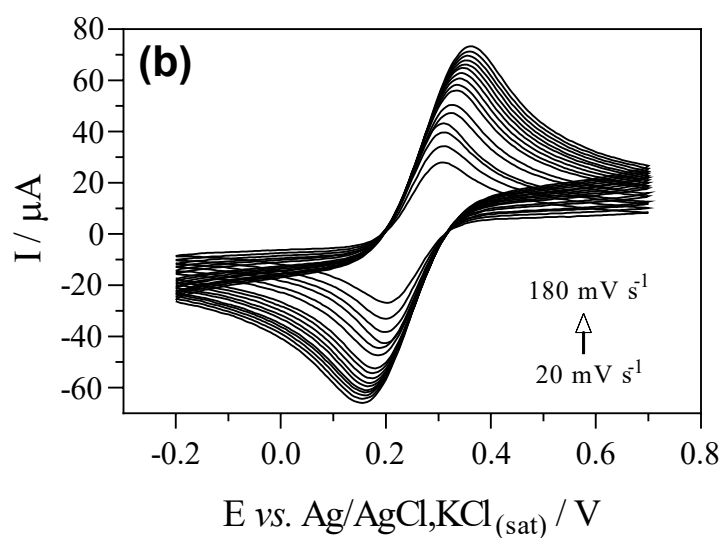

**Figure S1.** Cyclic voltammetry for (a) GCE/WP and (b) GCE/AP in  $\text{K}_3\text{Fe}(\text{CN})_6/\text{K}_4\text{Fe}(\text{CN})_6$   $5 \text{ mmol L}^{-1}$  at different scan rates.

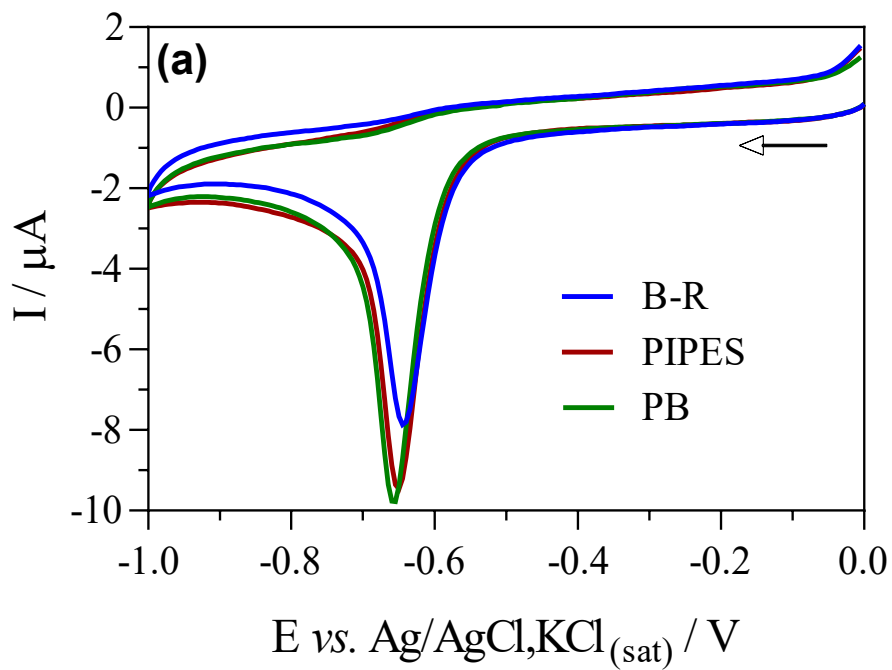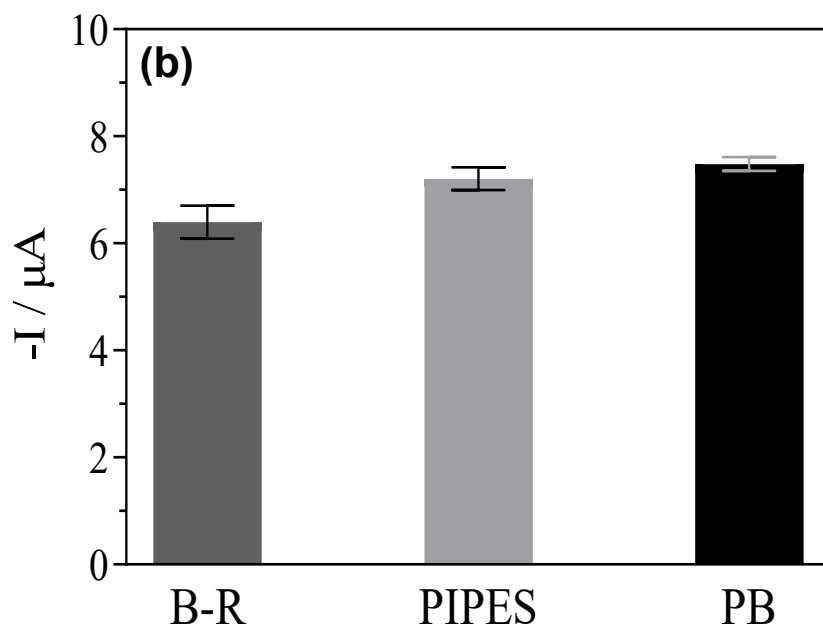

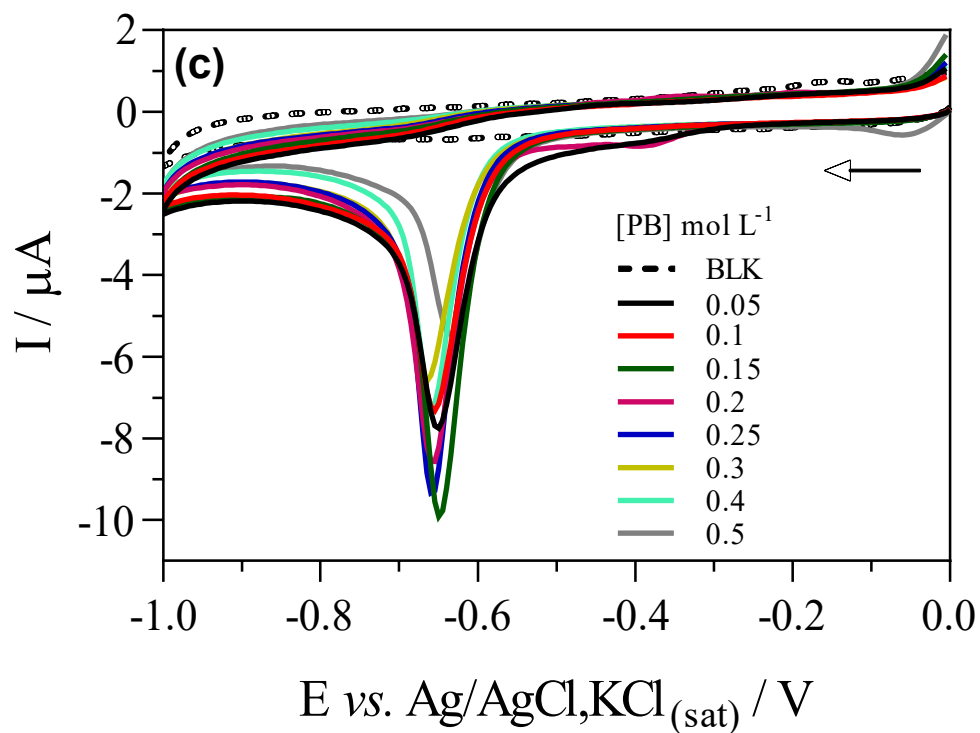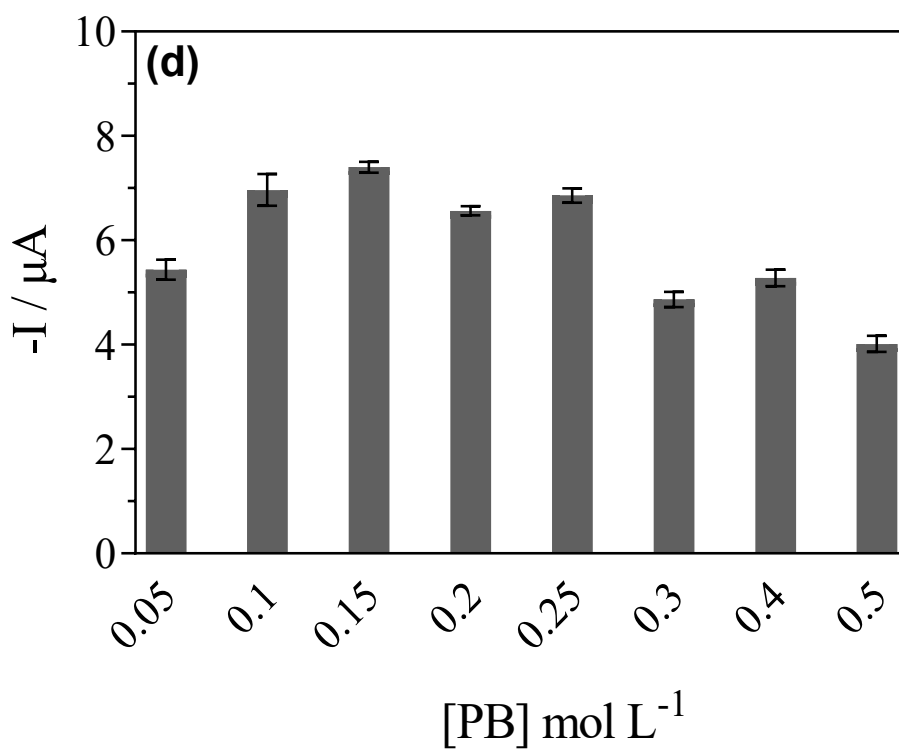

**Figure S2.** (a) Cyclic voltammometry study for  $25 \mu\text{mol L}^{-1}$  NMP in buffer solutions, such as B-R, PIPES and PB at pH 6 ( $0.1 \text{ mol L}^{-1}$ ) and (b) its correspondent bar graph for each cathodic current intensity on GCE/AP ( $v = 50 \text{ mV s}^{-1}$ );  $n = 3$ . (c) Comparisons of  $25 \mu\text{mol}$

$L^{-1}$  NMP between different PB concentrations and (d) the bar chart for the current sign obtained on GCE/AP ( $v = 50 \text{ mV s}^{-1}$ );  $n = 3$ .

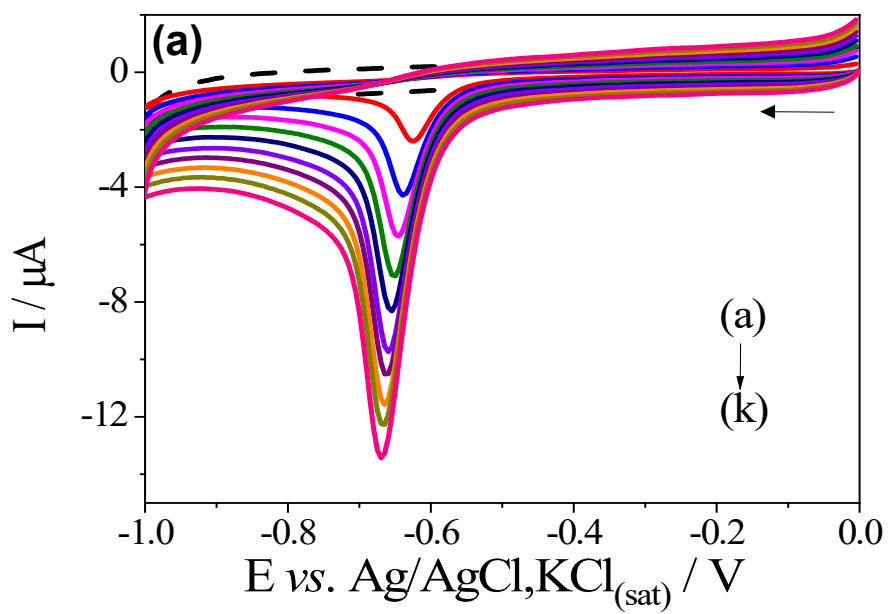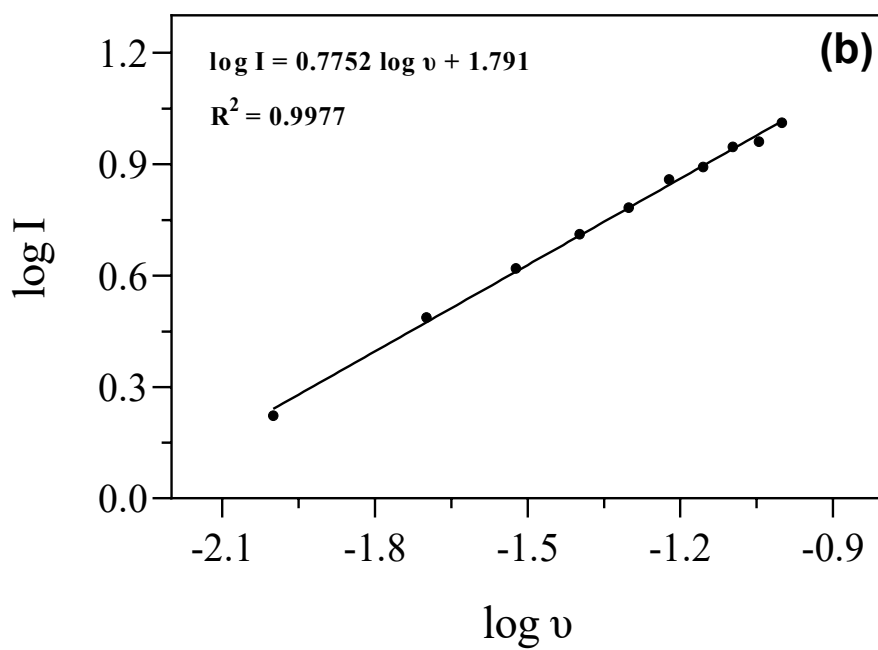

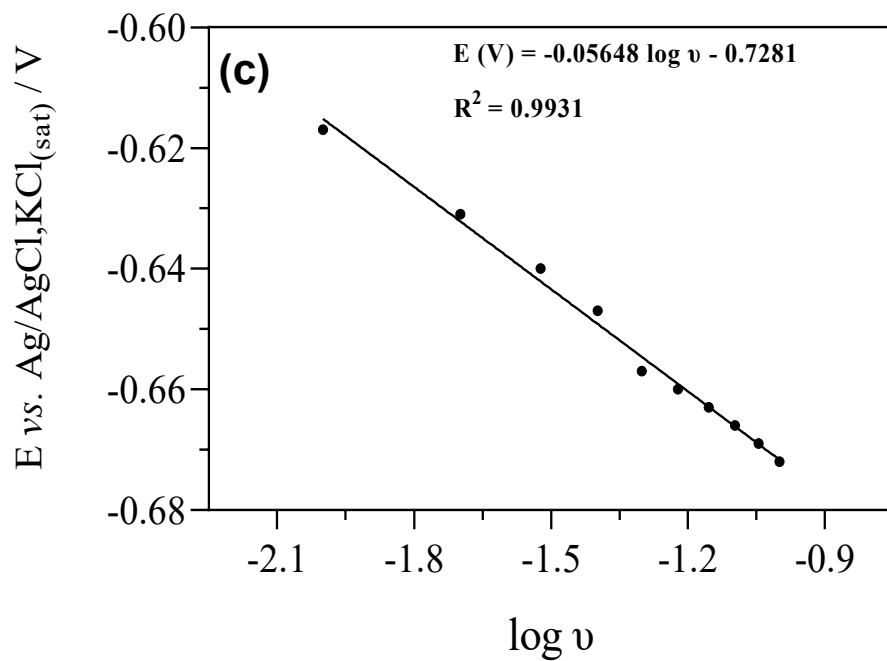

**Figure S3.** (a) CV for NMP  $25 \mu\text{mol L}^{-1}$  in PB 0.15 (pH 6) for towards scan rates: (a), BLK, (b) 10, (c) 20, (d) 30, (e) 40, (f) 50, (g) 60, (h) 70, (i) 80, (j) 90 and (k)  $100 \text{ mV s}^{-1}$ . Plot graphs of (b)  $\log I$  vs.  $\log v$  and (c)  $E$  vs.  $\log v$ .

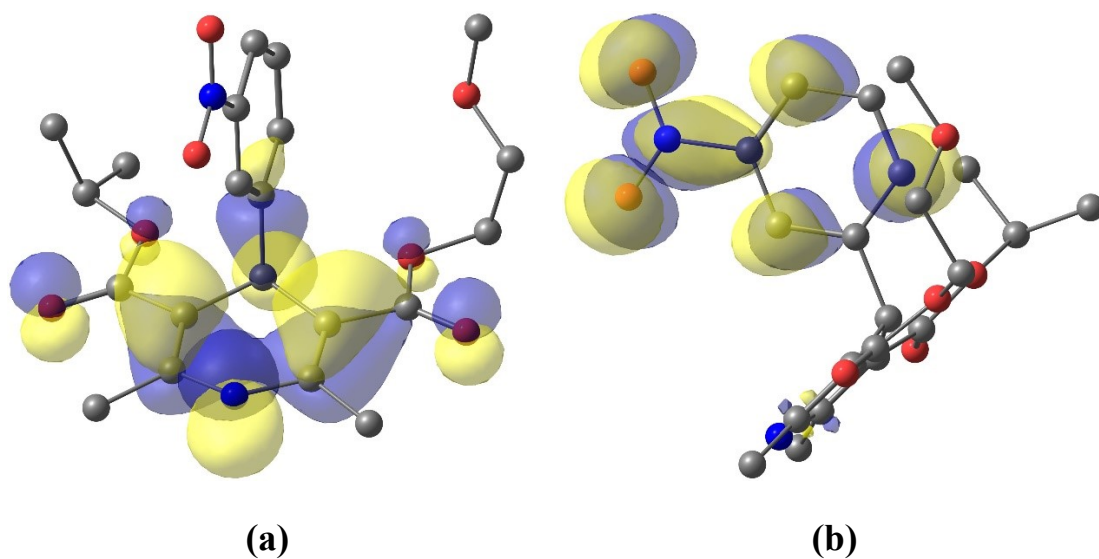

**Figure S4.** Frontier molecular orbitals; (a) HOMO and (b) LUMO of NMP. The gray, red, and blue spheres represents carbon, oxygen, and nitrogen atoms, respectively. The hydrogen atoms were suppressed for sake of clarity.



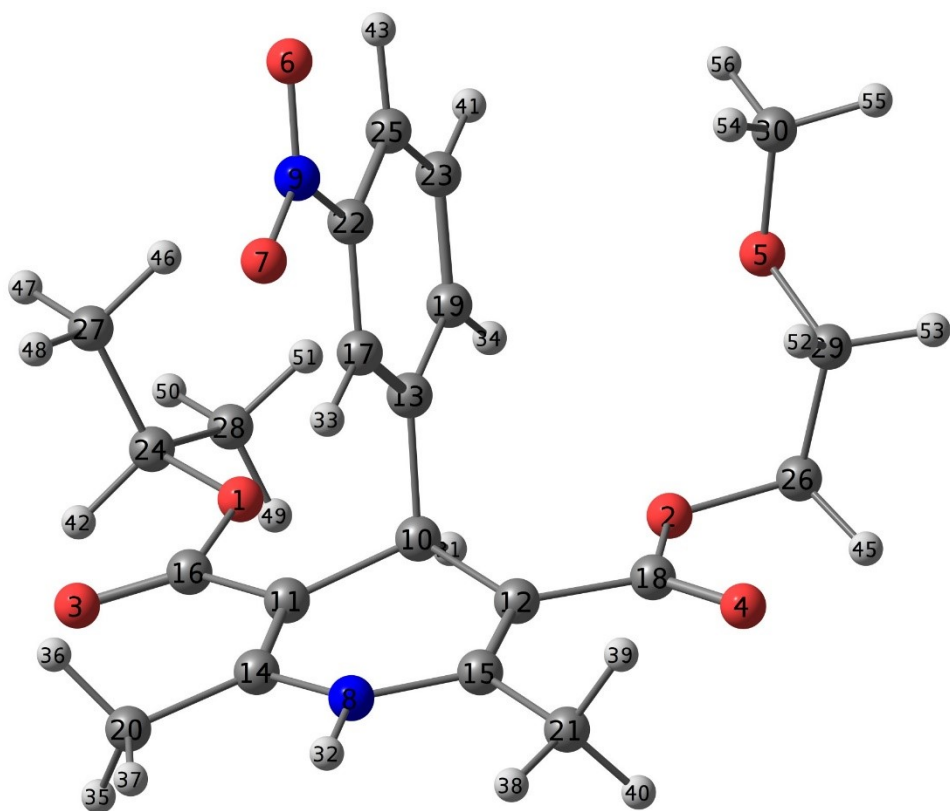

**Figure S5.** Atom labels of NMP optimized at BP86/Def2-TZVPPD-D3BJ level of theory.

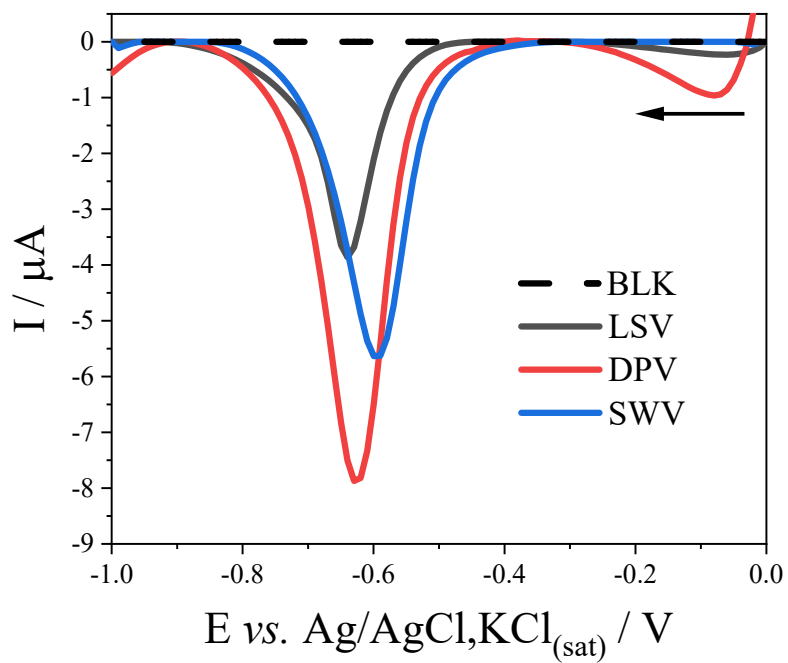

**Figure S6.** Baseline corrected voltammograms obtained from LSV, DPV and SWV for NMP  $25 \mu\text{mol L}^{-1}$  in PB  $0.15 \text{ mol L}^{-1}$  (pH 6) with GCE/AP sensor ( $v = 50 \text{ mV s}^{-1}$ ).

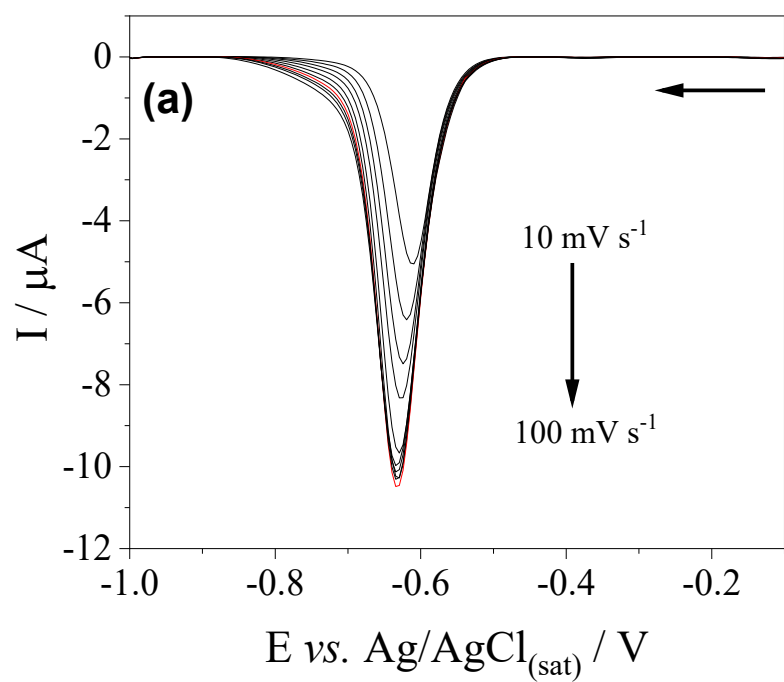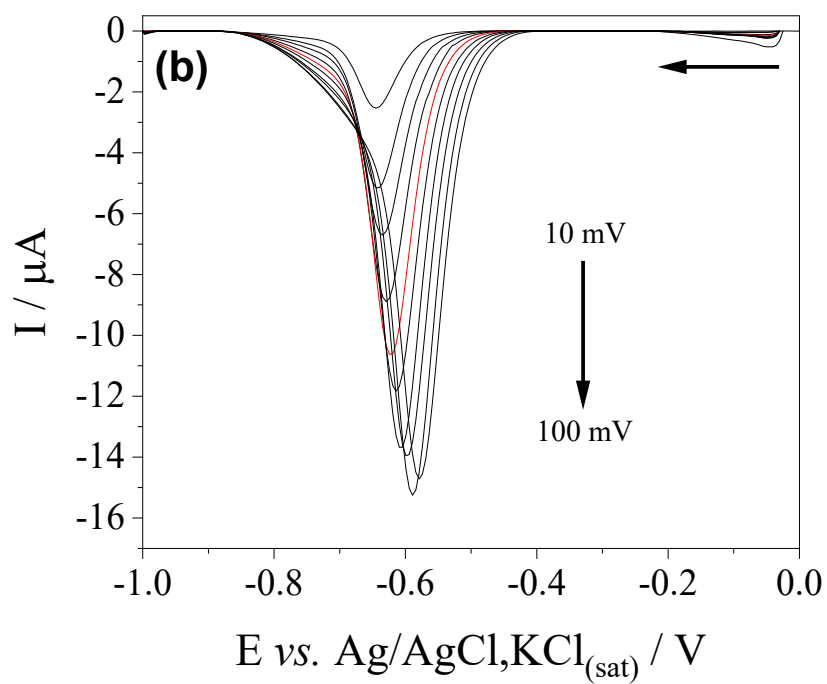

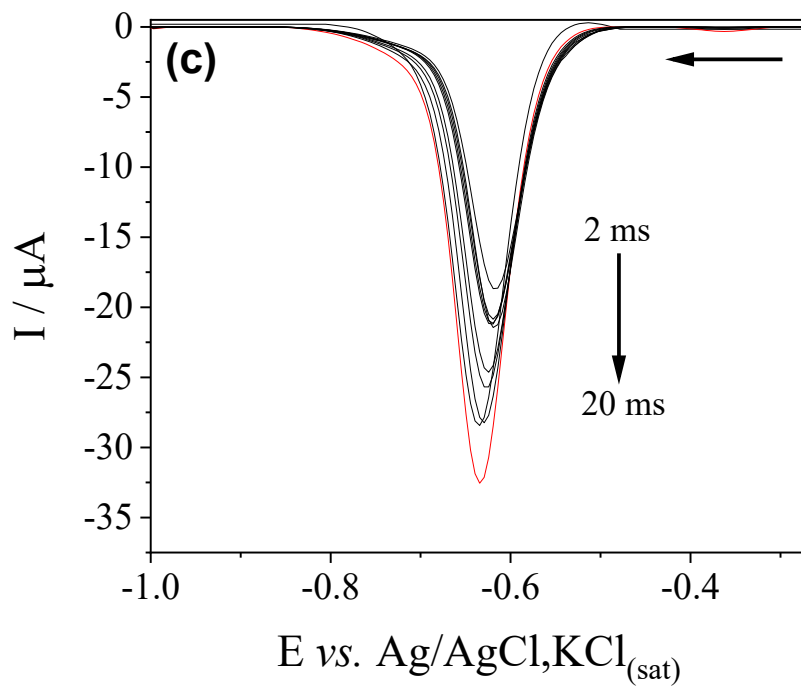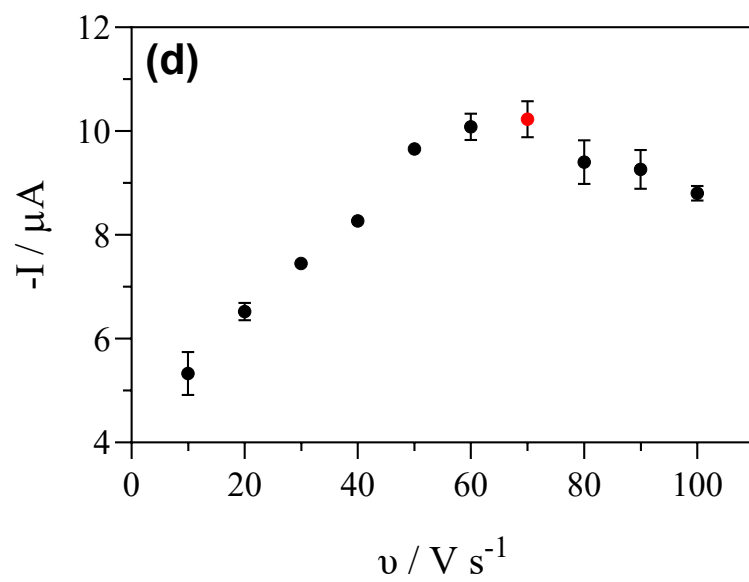

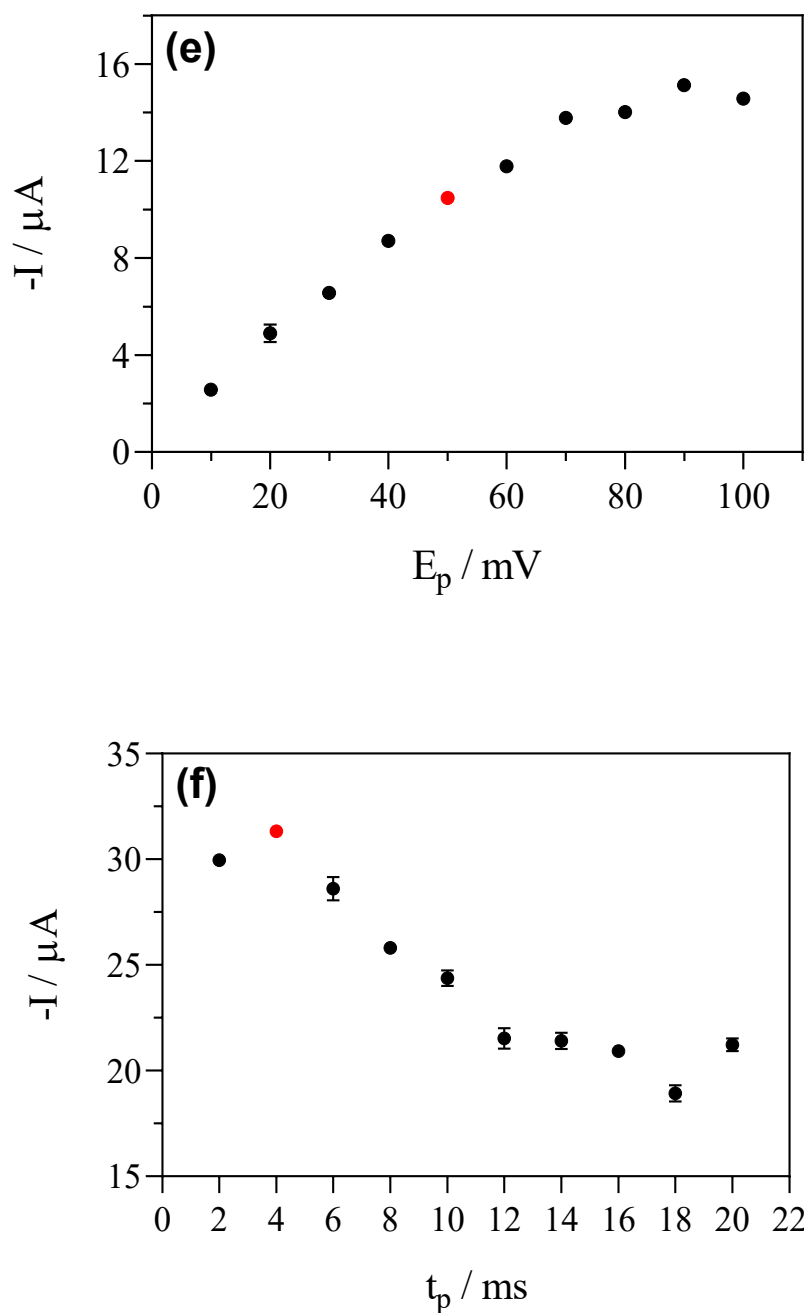

**Figure S7.** Baseline corrected voltammograms obtained by the optimization of DPV parameters for NMP  $40 \mu\text{mol L}^{-1}$  in PB  $0.15 \text{ mol L}^{-1}$  (pH 6) with GCE/AP sensor for (a)  $E_p = 50 \text{ mV}$ ,  $t_p = 5 \text{ ms}$  and  $\nu$  between 10 and  $100 \text{ mV s}^{-1}$ ; (b)  $t_p = 5 \text{ ms}$ ,  $\nu = 70 \text{ mV s}^{-1}$  and  $E_p$  between 10 and  $100 \text{ mV}$  and (c)  $\nu = 70 \text{ mV s}^{-1}$ ,  $E_p = 50 \text{ mV}$  and  $t_p$  between 2 and 20 ms. Plot graphs of (d)  $-I$  vs.  $\nu$  ( $n = 3$ ), (e)  $-I$  vs.  $E_p$  ( $n = 3$ ) and (f)  $-I$  vs.  $t_p$  ( $n = 3$ ).

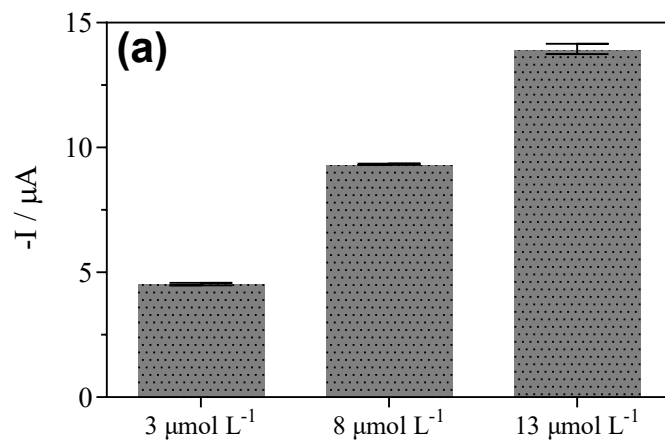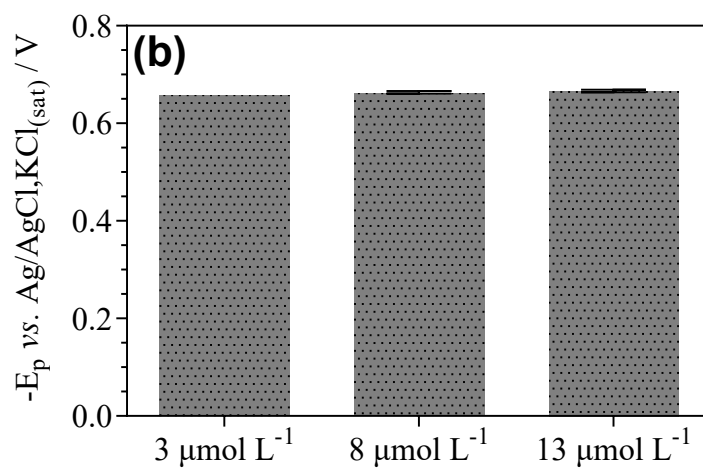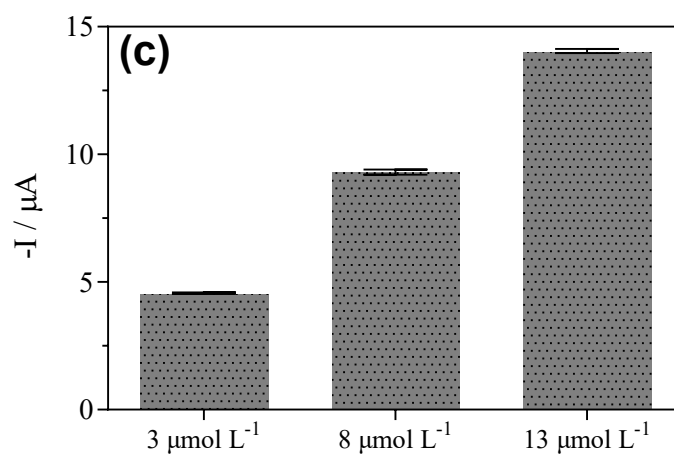

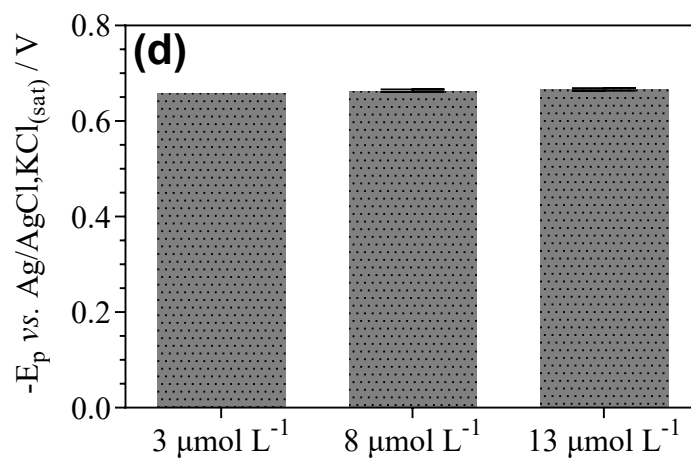

**Figure S8.** Current and peak potential monitoring for (a,b) intra-day and (c,d) inter-day repeatability study for three different concentrations of NMP, such as 3, 8 and 13  $\mu\text{mol L}^{-1}$  in PB 0.15  $\text{mol L}^{-1}$  (pH 6) with GCE/AP sensor for DPV ( $v = 70 \text{ mV s}^{-1}$ ,  $E_p = 50 \text{ mV}$  and  $t_p = 4 \text{ ms}$ );  $n = 7$ .

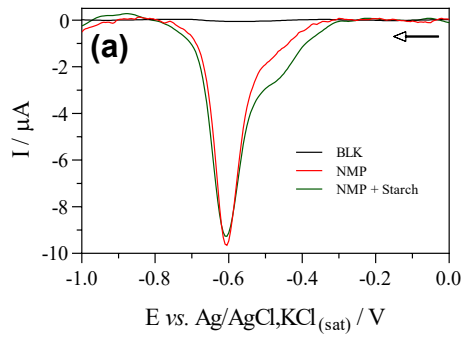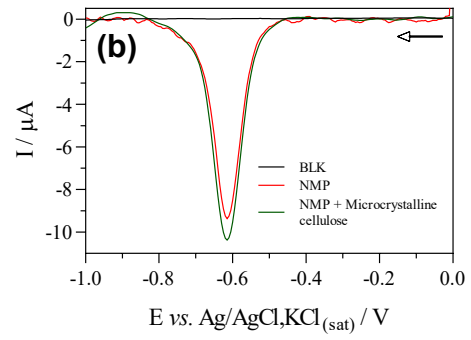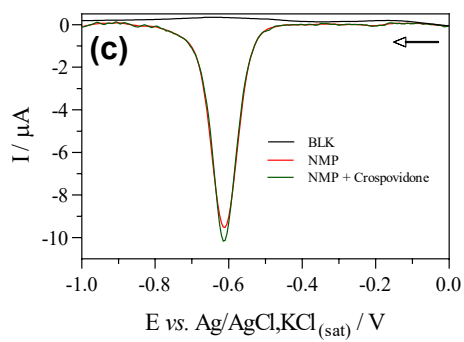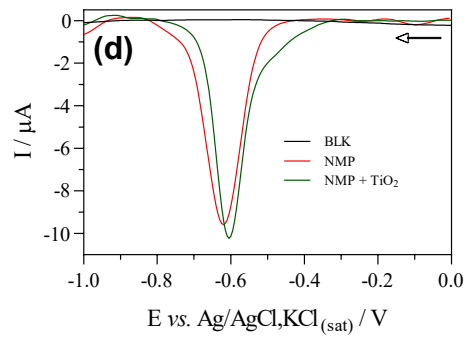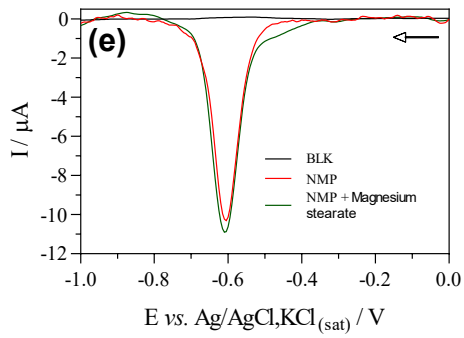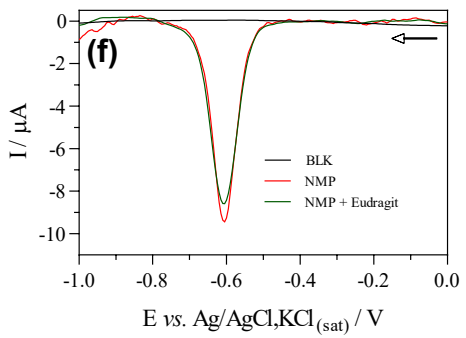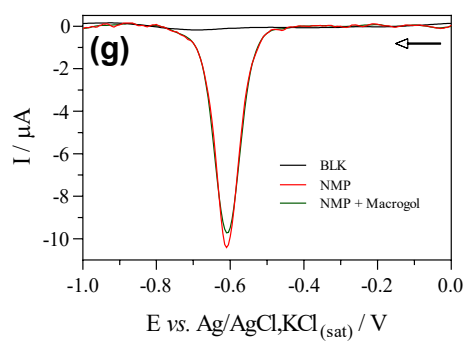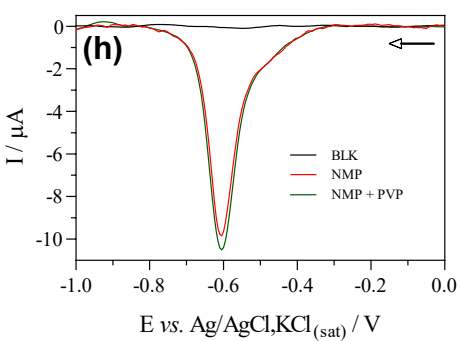



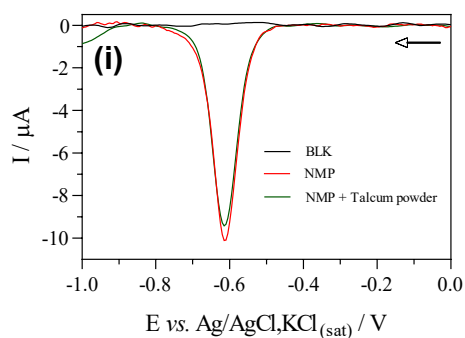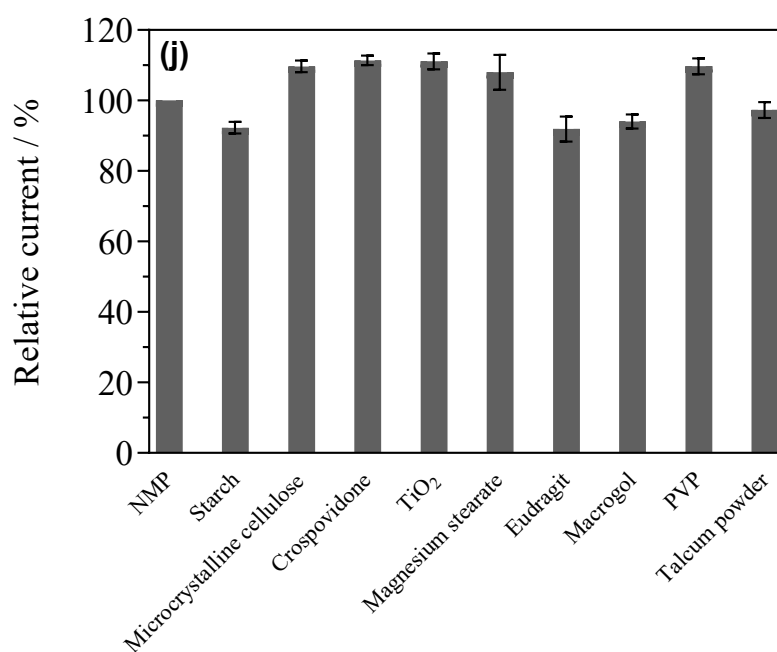

**Figure S9.** DP normalized voltammograms obtained in PB 0.15 mol L<sup>-1</sup> (pH 6) with GCE/AP sensor for NMP in the presence of potential interferences, such as (a) starch, (b) microcrystalline cellulose, (c) crospovidone, (d) TiO<sub>2</sub>, (e) magnesium stearate, (f) eudragit, (g) macrogol, (h) PVP and (i) talcum powder. (j) The relative current (%) for each potential interferent ( $n = 3$ ).

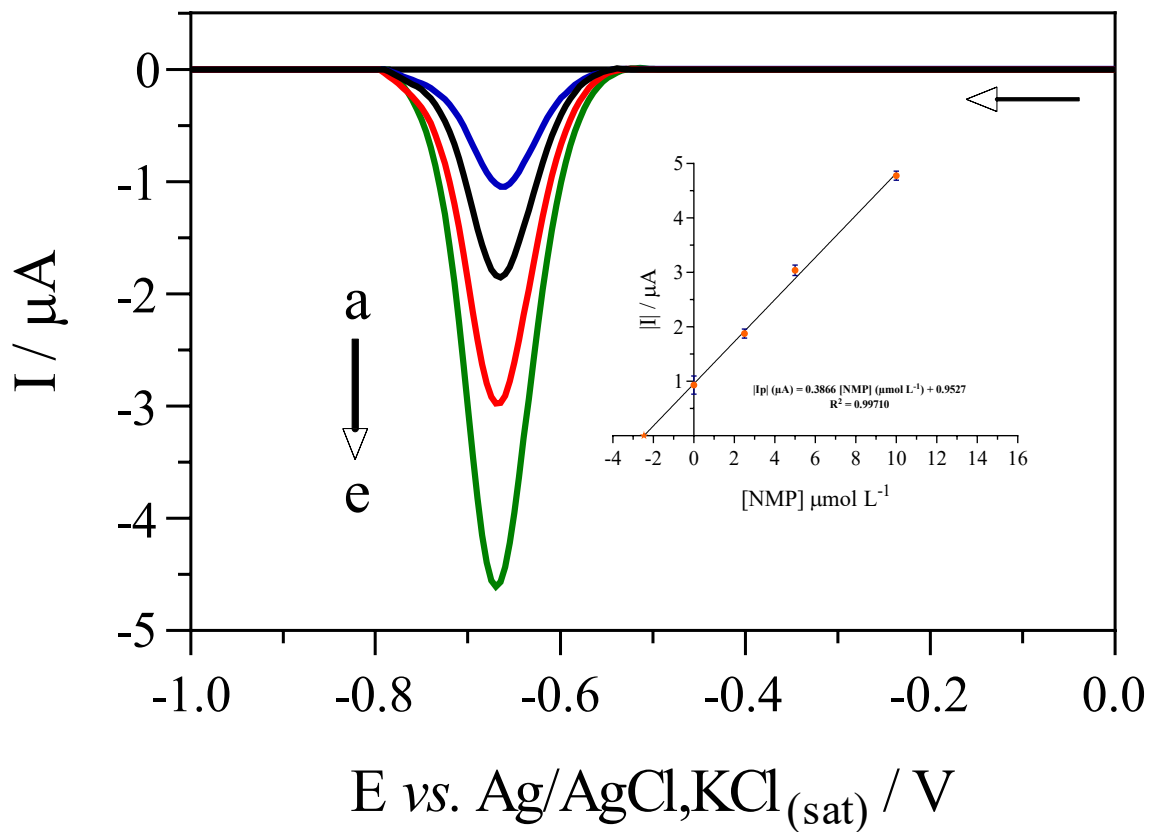

**Figure S10.** DP voltammograms obtained in  $0.15 \text{ mol L}^{-1}$  PB (pH 6.0) for NMP quantification in pharmaceutical tablets and the respective standard addition plot for (a) blank, (b) sample, (c) 2.5, (d) 5.0 and (e)  $10.0 \mu\text{mol L}^{-1}$  of NMP (*inset*);  $n = 3$ .

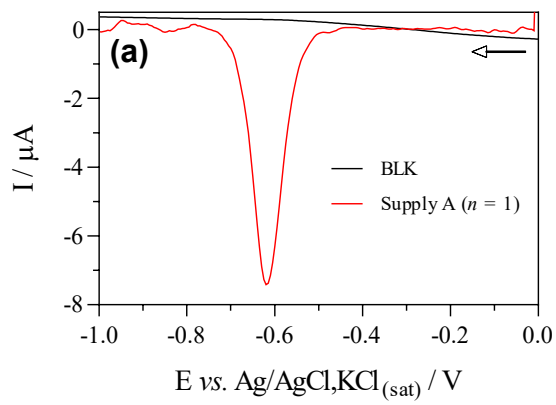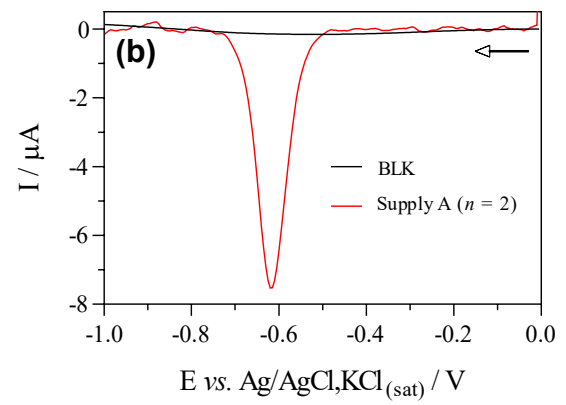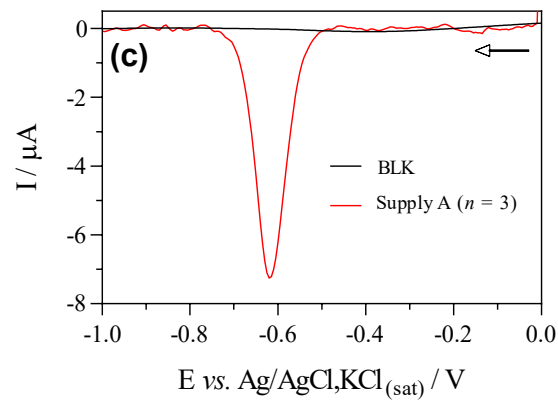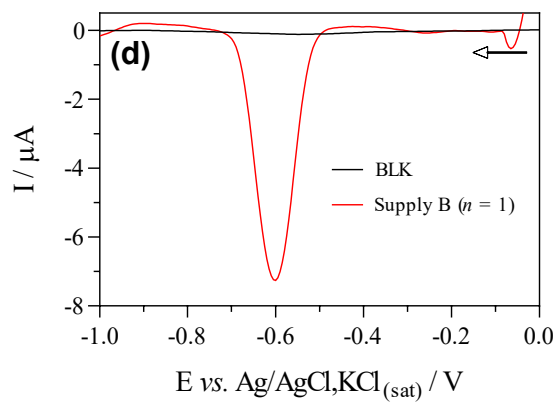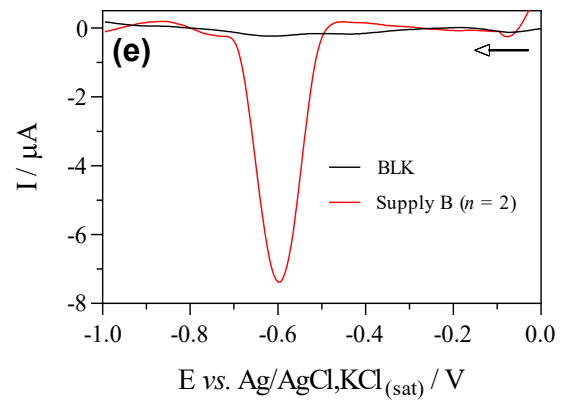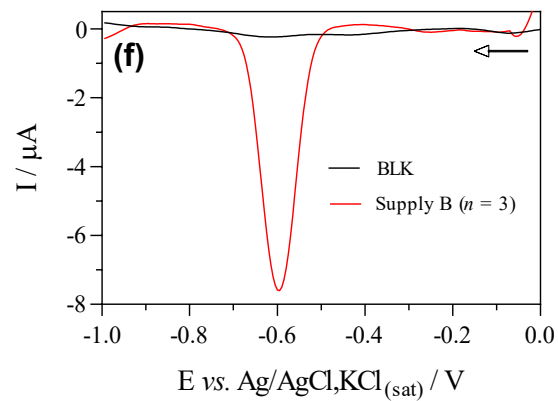

**Figure S11.** DP normalized voltammograms obtained in PB 0.15 mol L<sup>-1</sup> (pH 6) with GCE/AP sensor for NMP in supply A (a-c) and supply B samples (d-f) in triplicate for each one.

**Table S1.** Fukui index of all atoms of NMP calculated at BP86/Def2-TZVPPD-D3BJ.

| Atom  | $f^-$   | $f^+$   | $f^0$  | $\Delta f$ |
|-------|---------|---------|--------|------------|
| 1(O)  | 0.0110  | 0.0057  | 0.0084 | -0.0053    |
| 2(O)  | 0.0115  | 0.0066  | 0.0091 | -0.0049    |
| 3(O)  | 0.0504  | 0.0358  | 0.0431 | -0.0146    |
| 4(O)  | 0.0484  | 0.0365  | 0.0425 | -0.0119    |
| 5(O)  | 0.0358  | -0.0022 | 0.0168 | -0.0380    |
| 6(O)  | 0.0399  | 0.1006  | 0.0703 | 0.0607     |
| 7(O)  | 0.0192  | 0.0943  | 0.0568 | 0.0751     |
| 8(N)  | 0.0635  | 0.0102  | 0.0369 | -0.0533    |
| 9(N)  | 0.0070  | 0.0574  | 0.0322 | 0.0504     |
| 10(C) | 0.0146  | 0.0054  | 0.0100 | -0.0092    |
| 11(C) | 0.0654  | 0.0178  | 0.0416 | -0.0476    |
| 12(C) | 0.0626  | 0.0178  | 0.0402 | -0.0448    |
| 13(C) | -0.0003 | 0.0144  | 0.0071 | 0.0147     |
| 14(C) | 0.0302  | 0.0320  | 0.0311 | 0.0018     |
| 15(C) | 0.0290  | 0.0335  | 0.0312 | 0.0045     |
| 16(C) | 0.0166  | 0.0200  | 0.0183 | 0.0034     |
| 17(C) | -0.0012 | 0.0152  | 0.0070 | 0.0164     |
| 18(C) | 0.0175  | 0.0213  | 0.0194 | 0.0038     |
| 19(C) | 0.0036  | 0.0458  | 0.0247 | 0.0422     |
| 20(C) | 0.0135  | 0.0120  | 0.0127 | -0.0015    |
| 21(C) | 0.0131  | 0.0124  | 0.0128 | -0.0007    |
| 22(C) | 0.0107  | 0.0202  | 0.0154 | 0.0095     |
| 23(C) | 0.0147  | 0.0291  | 0.0219 | 0.0144     |
| 24(C) | 0.0051  | 0.0037  | 0.0044 | -0.0014    |
| 25(C) | 0.0205  | 0.0414  | 0.0310 | 0.0209     |
| 26(C) | 0.0099  | 0.0070  | 0.0084 | -0.0029    |
| 27(C) | 0.0054  | 0.0030  | 0.0042 | -0.0024    |

---

|       |         |        |        |         |
|-------|---------|--------|--------|---------|
| 28(C) | 0.0051  | 0.0048 | 0.0050 | -0.0003 |
| 29(C) | 0.0104  | 0.0028 | 0.0066 | -0.0076 |
| 30(C) | 0.0128  | 0.0031 | 0.0080 | -0.0097 |
| 31(H) | 0.0292  | 0.0106 | 0.0199 | -0.0186 |
| 32(H) | 0.0321  | 0.0147 | 0.0234 | -0.0174 |
| 33(H) | -0.0005 | 0.0096 | 0.0046 | 0.0101  |
| 34(H) | 0.0064  | 0.0226 | 0.0145 | 0.0162  |
| 35(H) | 0.0188  | 0.0183 | 0.0185 | -0.0005 |
| 36(H) | 0.0171  | 0.0129 | 0.0150 | -0.0042 |

---

**Table S2.** Fukui index of all atoms of NMP calculated at BP86/Def2-TZVPPD-D3BJ.

| Atom  | $f^-$  | $f^+$   | $f^0$  | $\Delta f$ |
|-------|--------|---------|--------|------------|
| 37(H) | 0.0175 | 0.0145  | 0.0160 | -0.0030    |
| 38(H) | 0.0177 | 0.0149  | 0.0163 | -0.0028    |
| 39(H) | 0.0166 | 0.0142  | 0.0154 | -0.0024    |
| 40(H) | 0.0179 | 0.0177  | 0.0178 | -0.0002    |
| 41(H) | 0.0141 | 0.0235  | 0.0188 | 0.0094     |
| 42(H) | 0.0101 | 0.0102  | 0.0102 | 0.0001     |
| 43(H) | 0.0157 | 0.0265  | 0.0211 | 0.0108     |
| 44(H) | 0.0140 | 0.0109  | 0.0124 | -0.0031    |
| 45(H) | 0.0134 | 0.0112  | 0.0123 | -0.0022    |
| 46(H) | 0.0024 | -0.0023 | 0.0000 | -0.0047    |
| 47(H) | 0.0152 | 0.0143  | 0.0148 | -0.0009    |
| 48(H) | 0.0020 | 0.0005  | 0.0013 | -0.0015    |
| 49(H) | 0.0052 | 0.0068  | 0.0060 | 0.0016     |
| 50(H) | 0.0138 | 0.0128  | 0.0133 | -0.0010    |
| 51(H) | 0.0025 | 0.0006  | 0.0015 | -0.0019    |
| 52(H) | 0.0077 | -0.0015 | 0.0031 | -0.0092    |
| 53(H) | 0.0231 | 0.0138  | 0.0185 | -0.0093    |
| 54(H) | 0.0102 | -0.0031 | 0.0035 | -0.0133    |
| 55(H) | 0.0202 | 0.0133  | 0.0168 | -0.0069    |
| 56(H) | 0.0116 | 0.0041  | 0.0078 | -0.0075    |

**SI – xyz data.**

---

Molecule: **NMP**

---

O -3.726814000 -0.369948000 -0.447073000  
O -0.503887000 -3.636910000 -1.383886000  
O -4.121409000 0.521380000 1.614689000  
O 1.107655000 -4.346175000 0.065468000  
O 0.466431000 -2.881961000 -4.076852000  
O 2.156437000 3.101324000 -1.187350000  
O 1.821944000 2.211543000 0.783447000  
N -0.599690000 -1.577294000 2.837245000  
N 1.631251000 2.271876000 -0.436831000  
C -1.446109000 -1.624292000 0.140807000  
C -2.220902000 -0.914913000 1.243024000  
C -0.423185000 -2.600243000 0.709116000  
C -0.762680000 -0.602329000 -0.766063000  
C -1.744823000 -0.865364000 2.520917000  
C 0.006716000 -2.497063000 2.001880000  
C -3.438736000 -0.181126000 0.876753000  
C 0.107429000 0.339870000 -0.212459000  
C 0.160077000 -3.607233000 -0.179674000  
C -0.998085000 -0.577612000 -2.145805000  
C -2.347105000 -0.108935000 3.667726000  
C 1.087892000 -3.311258000 2.648897000  
C 0.712429000 1.282626000 -1.039671000  
C -0.389879000 0.380928000 -2.960733000  
C -4.808820000 0.433561000 -1.007889000  
C 0.475875000 1.326520000 -2.414467000  
C 0.049601000 -4.522393000 -2.380813000  
C -4.257228000 1.805179000 -1.375091000

---



---

C -5.333411000 -0.346623000 -2.201237000  
C 1.099632000 -3.820206000 -3.214708000  
C 1.413342000 -2.078062000 -4.764059000  
H -2.152978000 -2.180465000 -0.485619000  
H -0.279966000 -1.539862000 3.798504000  
H 0.317811000 0.360925000 0.854847000  
H -1.661727000 -1.322155000 -2.581654000  
H -3.362354000 -0.464035000 3.881839000  
H -2.444790000 0.955652000 3.426644000  
H -1.731814000 -0.219805000 4.571570000  
H 1.198854000 -3.038151000 3.707528000  
H 2.046939000 -3.164294000 2.138284000  
H 0.869311000 -4.383156000 2.577444000  
H -0.592444000 0.389815000 -4.030985000  
H -5.581125000 0.534129000 -0.232584000  
H 0.964644000 2.086128000 -3.019558000  
H -0.799765000 -4.820067000 -3.007526000  
H 0.487334000 -5.399942000 -1.888563000  
H -3.436240000 1.704531000 -2.098481000  
H -5.046378000 2.422526000 -1.825774000  
H -3.883955000 2.323111000 -0.483566000  
H -5.691616000 -1.337948000 -1.895844000  
H -6.167948000 0.195253000 -2.665906000  
H -4.546188000 -0.477962000 -2.956659000  
H 1.824861000 -3.313483000 -2.551524000  
H 1.656749000 -4.572234000 -3.808633000  
H 2.003815000 -1.464077000 -4.060348000  
H 2.106687000 -2.694265000 -5.365653000  
H 0.853045000 -1.416201000 -5.434272000

---

**Table S3.** Optimization of DPV parameters for the determination of NMP.

| <b>Parameter</b>                 | <b>Mode/Interval</b>        | <b>Selected</b>       |
|----------------------------------|-----------------------------|-----------------------|
| Technique                        | LSV, DPV, SWV               | DPV                   |
| Scan rate / $\nu$                | 10 – 100 mV s <sup>-1</sup> | 70 mV s <sup>-1</sup> |
| Pulse potential / E <sub>p</sub> | 10 – 100 mV                 | 50 mV                 |
| Pulse time / t <sub>p</sub>      | 2 – 20 ms                   | 4 ms                  |
